# Supplementary material
Source: PubMed Central journal article supplement (PMC3167010)

## Supplementary Figure 1

**Abdominal ligation preparations:** Mosquitoes were cold anesthetized for 5-10 minutes. A fine Kevlar thread (Stren Powerbraid, Wilmington, DE) was firmly tied around the mosquito anterior to abdominal segment I and posterior to the halteres. The abdomen was removed and the anterior end sealed with wax (Boekel tackiwax, Philadelphia, PA). The loose end of the tied Kevlar thread was hung from a strip of parafilm (Pechiney Plastic Packaging; Chicago, Illinois) and placed inside of a humid glass chamber ( $\sim 700\text{cm}^3$ ).

**A:** Photograph of the humid glass chamber showing the abdomens hanging from the strip of parafilm. **B:** Detail of the abdomen preparations hanging from the strip of parafilm

A

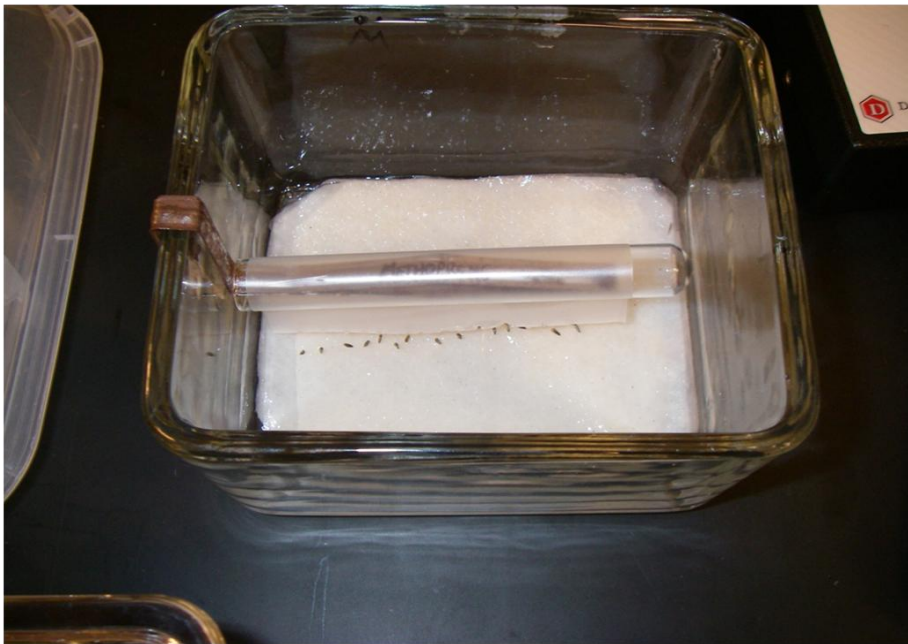

B

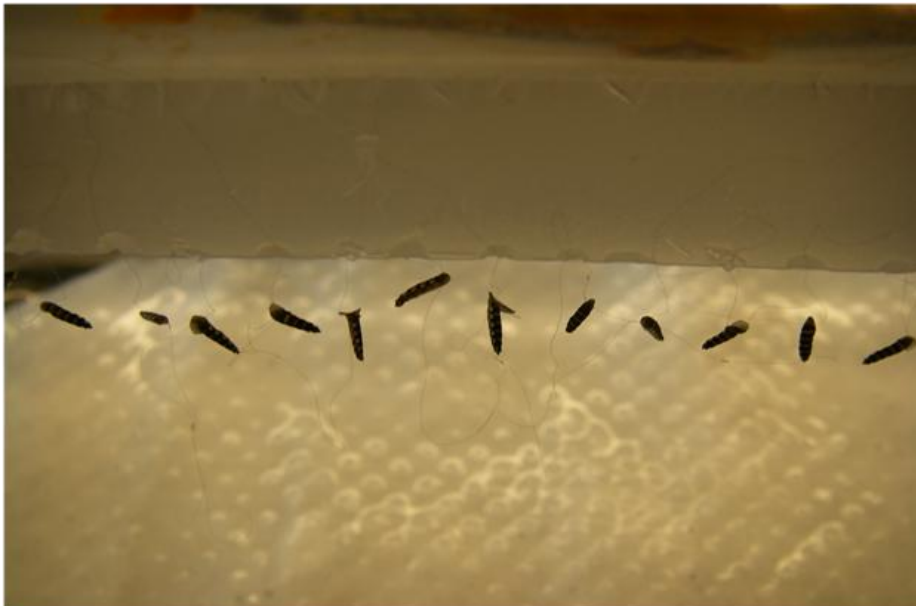

Supplement: NIHMS311314-supplement-01.pdf [file NIHMS311314-supplement-01.pdf]
