# Supplementary material
Source: PubMed Central journal article supplement (PMC3167010)

## Supplementary Figure 2

**(A):** Image of a normal follicle stained with neutral red: NC: nurse cell, FE: follicular epithelium, OC: oocyte.

**(B):** Image of an apoptotic follicle stained with neutral red: PN: pycnotic nucleus showing condensed chromatin. IS: intercellular space.

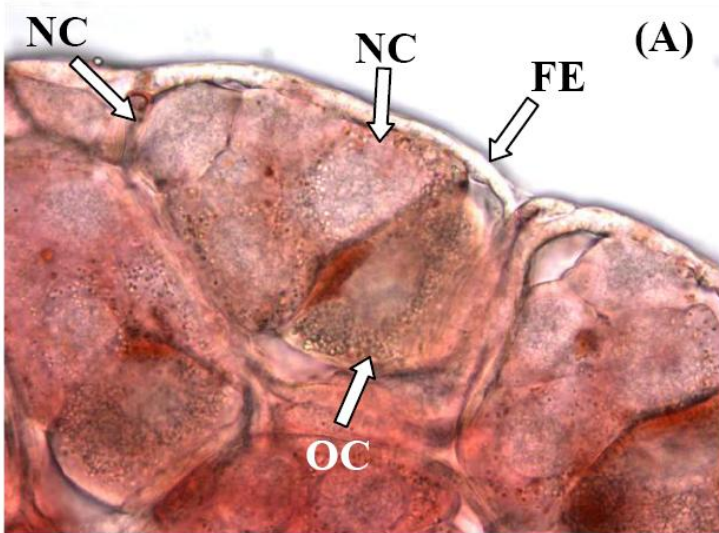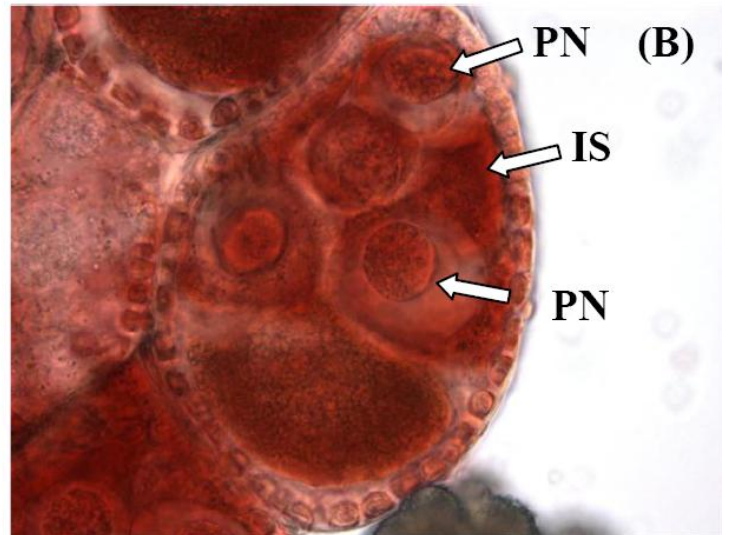

Supplement: NIHMS311314-supplement-02.pdf [file NIHMS311314-supplement-02.pdf]
